# Supplementary material for: Intramolecular charge transfer and solvation dynamics of push–pull dyes with different π-conjugated linkers
Source: Royal Society of Chemistry journal article supplement (doi:10.1039/c9cp02559f), 2019-01-01
Supplement: c9cp02559f1.pdf [file c9cp02559f1.pdf]

## ***Electronic Supplementary Information***

### **Intramolecular Charge Transfer and Solvation Dynamics of Push-Pull Dyes with Different $\pi$ -Conjugated Linkers**

*Xinmiao Niu,<sup>a,b</sup> Prabhat Gautam,<sup>c</sup> Zhuoran Kuang,<sup>a,b</sup> Craig P. Yu,<sup>c</sup> Yuanyuan Guo,<sup>a,b</sup> Hongwei Song,<sup>a,b</sup> Qianjin Guo,<sup>a</sup> Julian M. W. Chan<sup>\*c</sup> Andong Xia<sup>\*a,b</sup>*

<sup>a</sup> Beijing National Laboratory for Molecular Sciences (BNLMS), Key Laboratory of Photochemistry, Institute of Chemistry, Chinese Academy of Sciences, Beijing 100190, People's Republic of China

<sup>b</sup> University of Chinese Academy of Sciences, Beijing 100049, People's Republic of China

<sup>c</sup> Department of Chemistry and Biomolecular Sciences, University of Ottawa, 10 Marie Curie Pvt., Ottawa, Ontario K1N 6N5, Canada

## **Table of Contents**

**S1. Steady-state spectral data.**

**S2. Fluorescence lifetime measurements.**

**S3. Femtosecond transient absorption experiments.**

**S4. Nanosecond transient absorption experiments.**

**S5. Electrochemical experiments.**

**S6. Electronic-state transitions.**

## S1. Steady-state spectral data.

**Table S1.** Solvent parameters, absorption and fluorescence maxima, and Stokes shifts of dye 1 and dye 2.

|                 | 1            |                         |                         |                                           | 2                       |                         |                                           |
|-----------------|--------------|-------------------------|-------------------------|-------------------------------------------|-------------------------|-------------------------|-------------------------------------------|
|                 | $\Delta f^a$ | $\lambda_{abs}$<br>(nm) | $\lambda_{flu}$<br>(nm) | Stokes Shifts<br>( $\text{cm}^{-1}$ / nm) | $\lambda_{abs}$<br>(nm) | $\lambda_{flu}$<br>(nm) | Stokes Shifts<br>( $\text{cm}^{-1}$ / nm) |
| CHX             | 0            | 375                     | 413.2                   | 2465 / 38.2                               | 390                     | 434.8                   | 2642 / 44.8                               |
| $\text{CHCl}_3$ | 0.15         | 378                     | 464.8                   | 4940 / 86.8                               | 391                     | 483.4                   | 4889 / 92.4                               |
| THF             | 0.21         | 379                     | 493.4                   | 6118 / 114.4                              | 389                     | 505.4                   | 5921 / 116.4                              |
| DCM             | 0.22         | 379                     | 498                     | 6305 / 119                                | 392                     | 511.8                   | 5971 / 119.8                              |
| ACE             | 0.29         | 373                     | 524.8                   | 7755 / 151.8                              | 386                     | 535                     | 7215 / 149                                |
| ACN             | 0.31         | 370                     | 538.2                   | 8447 / 168.2                              | 385                     | 556.4                   | 8001 / 171.4                              |

<sup>a</sup> The polarity indices are taken from Ref 1.

## S2. Fluorescence lifetime measurements.

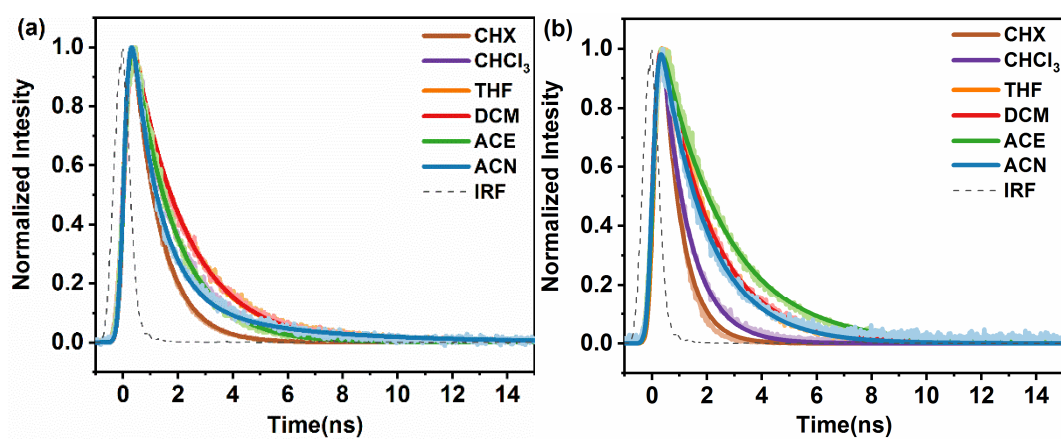

**Figure S1.** Fluorescence lifetimes of (a) dye 1 and (b) dye 2. Fitting results are also included.

### S3. Femtosecond transient absorption experiments.

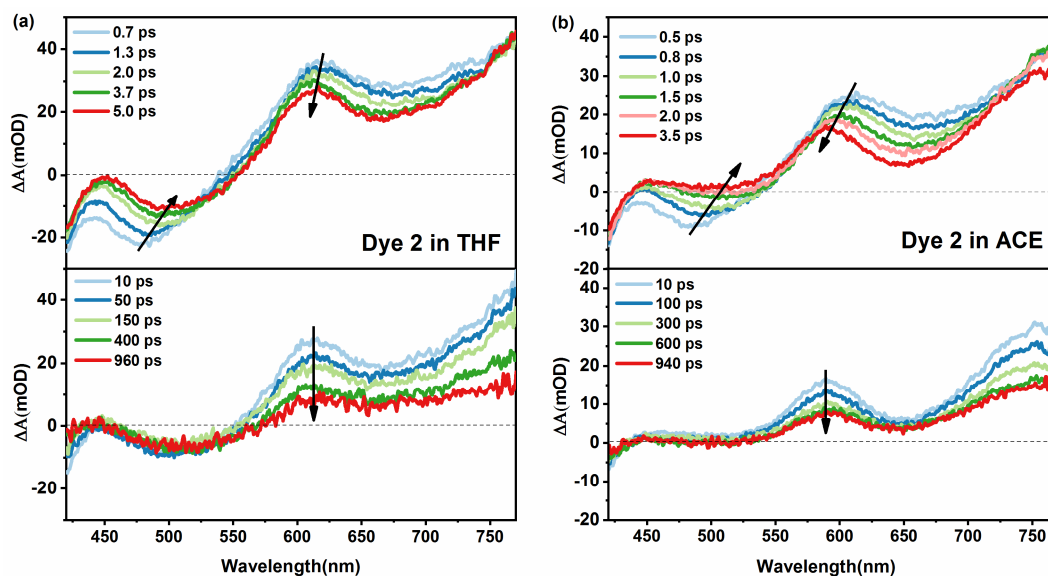

**Figure S2.** Femtosecond TA spectra for dye 2 (a) in THF and (b) in ACE, with different time delays.

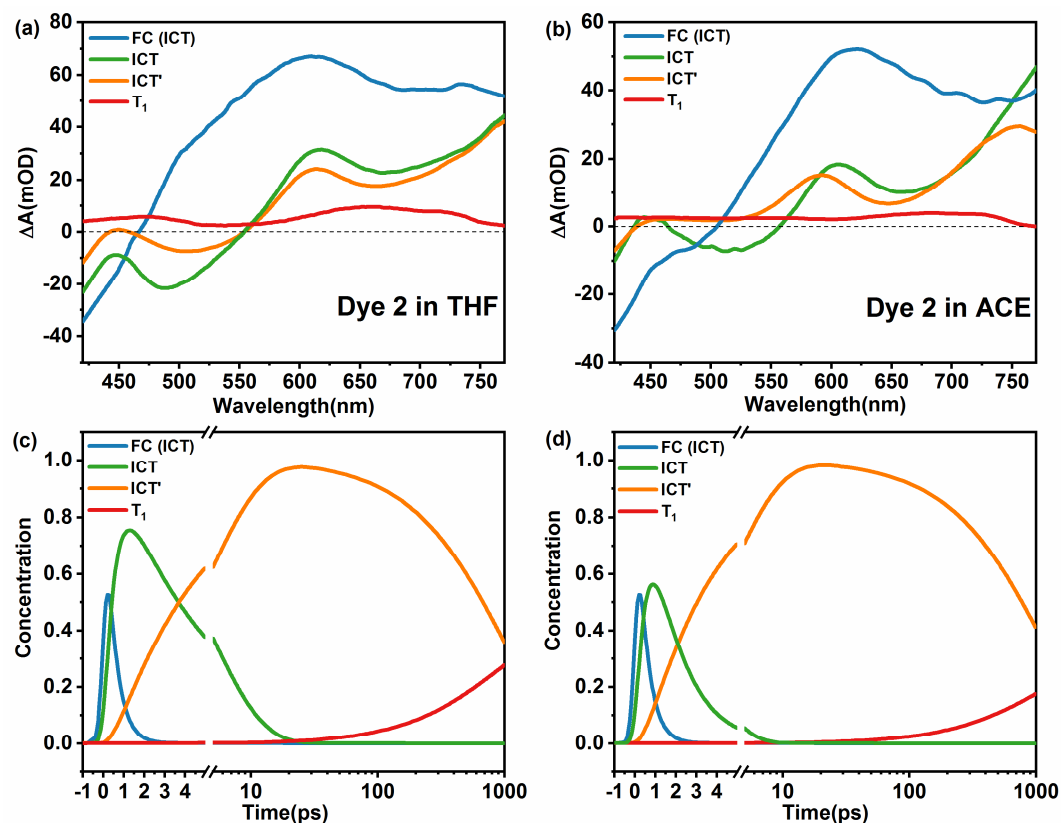

**Figure S3.** SADS from target analysis and concentration evolution of transient species. On the left are two plots for dye 2 in THF, and on the right are the corresponding plots for dye 2 in ACE.

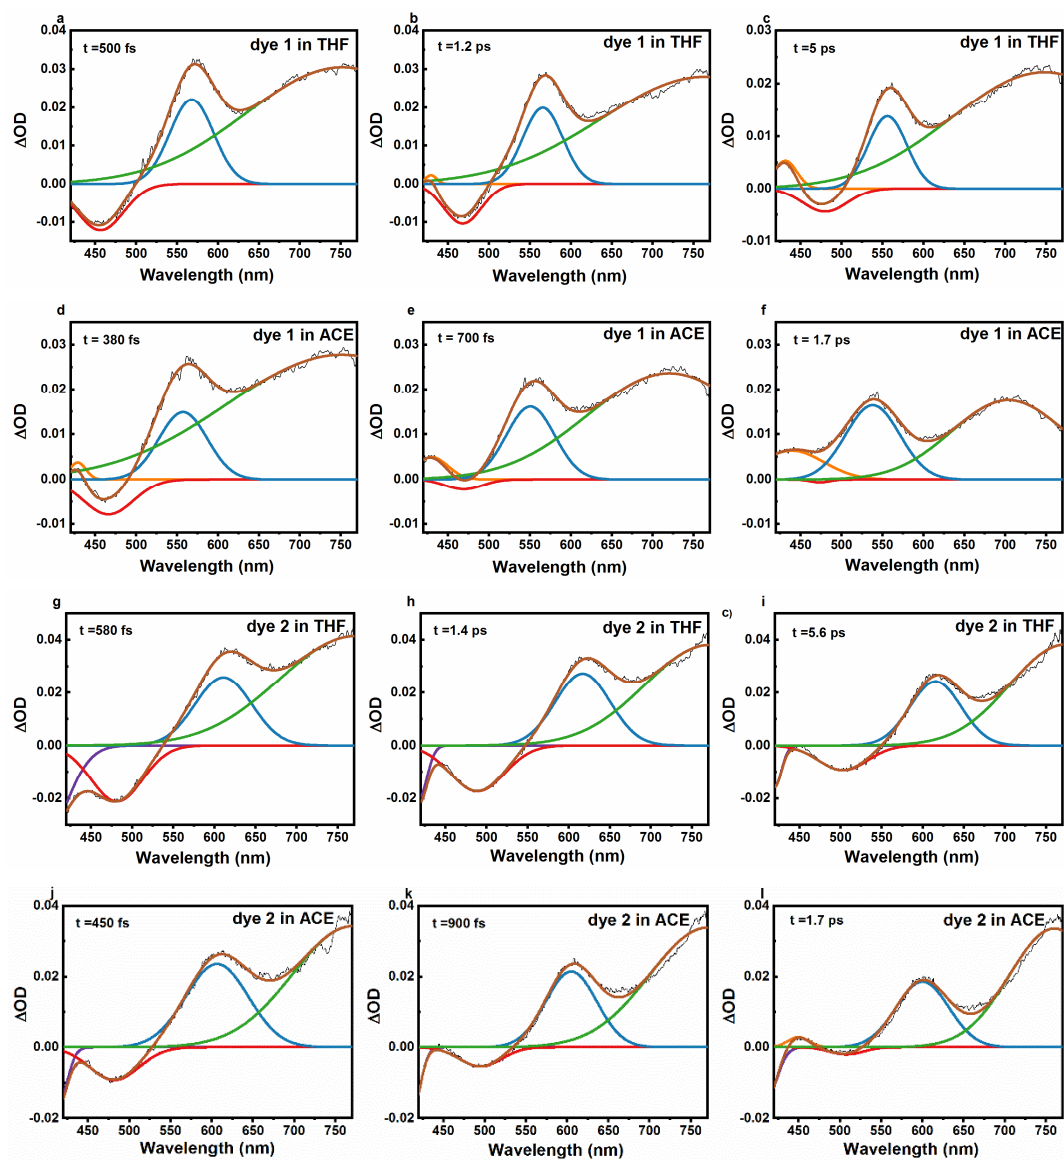

**Figure S4.** Selected femtosecond transient absorption spectra of dye 1 in THF (a, b, c), ACE (d, e, f), and dye 2 in THF (g, h, i), ACE (j, k, l) at three representative time delays.

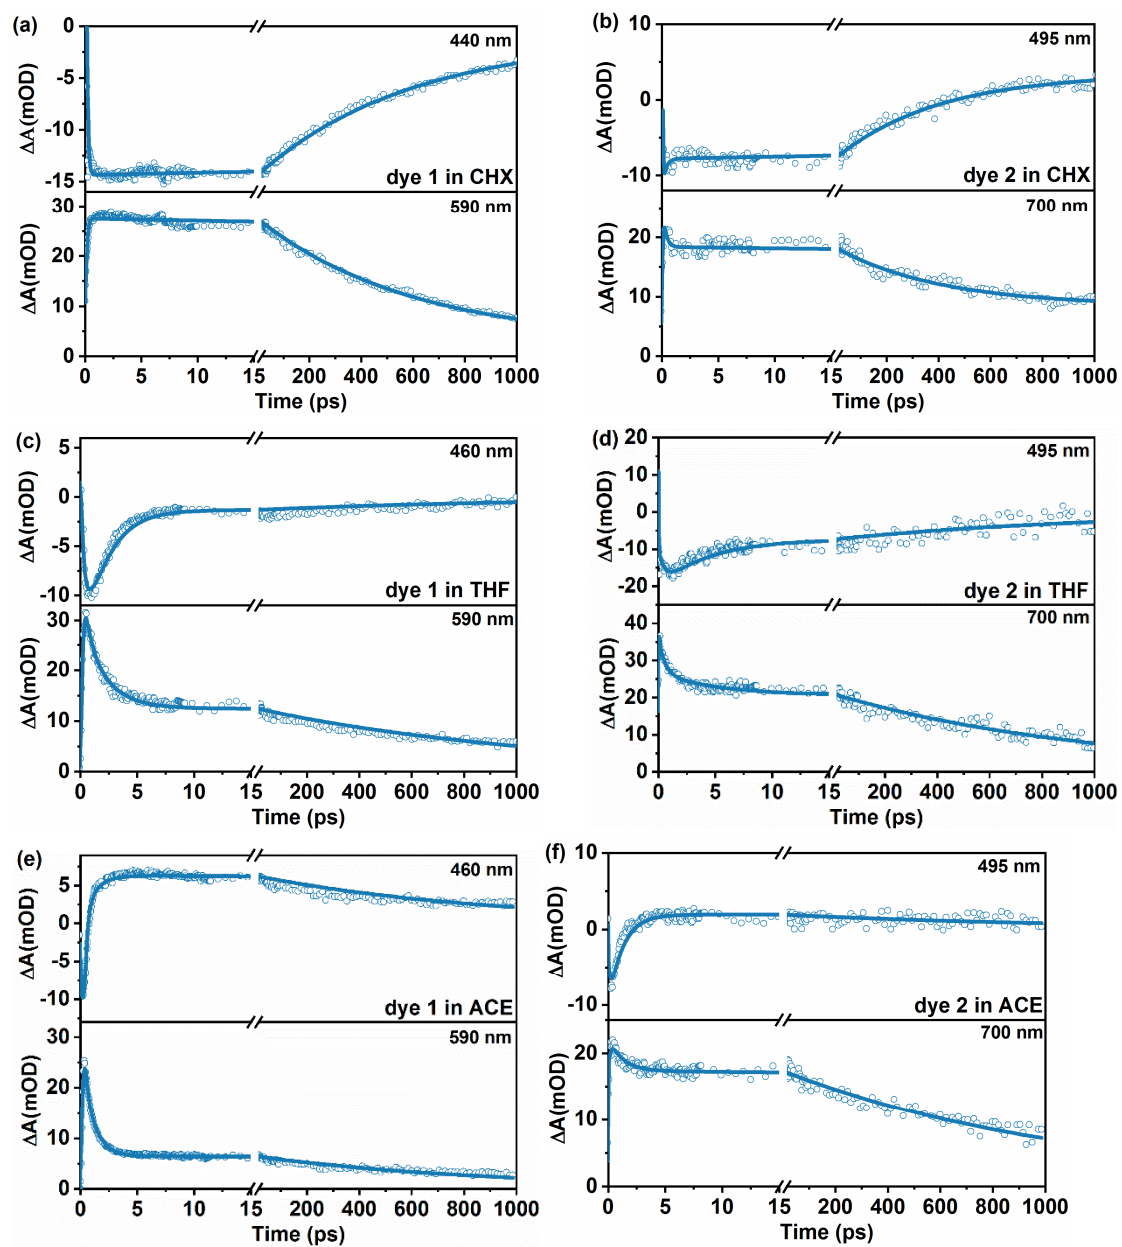

**Figure S5.** Kinetics of femtosecond transient absorption spectra of dye 1 in: (a) CHX, (c) THF, and (e) ACE at selected wavelengths are plotted (dot) together with global fitting curves (line) of all collected time traces, and (b, d, f) are the corresponding plots for dye 2.

## S4. Nanosecond transient absorption experiments.

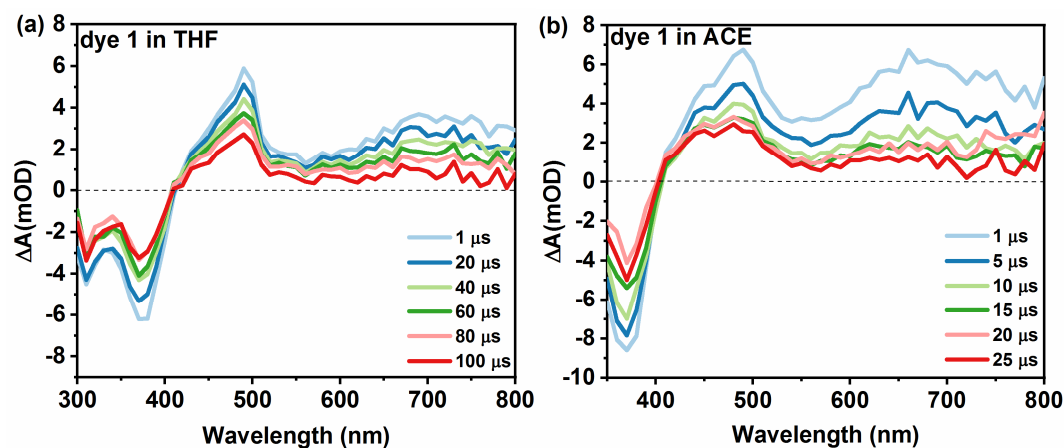

Figure S6. Nanosecond transient absorption spectra of dye 1 in THF and in ACE.

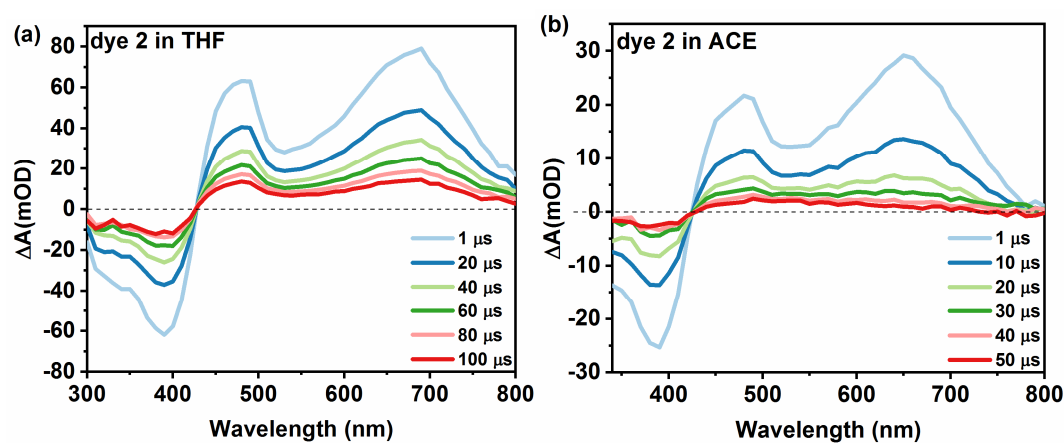

Figure S7. Nanosecond transient absorption spectra of dye 2 in THF and in ACE.

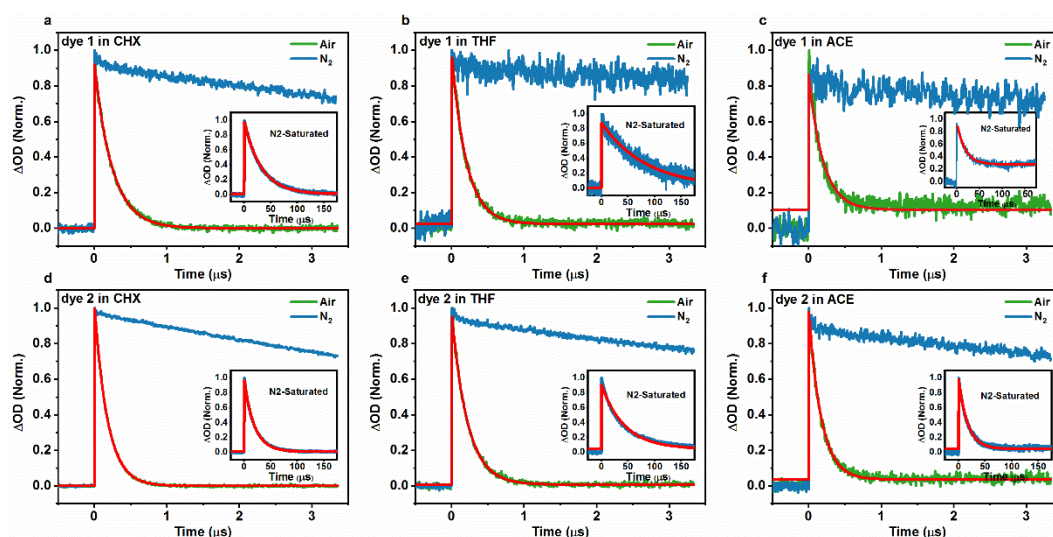

Figure S8. The kinetic traces of dye 1 and dye 2 in CHX, THF, and ACE solutions under different gas conditions (N<sub>2</sub>, air).

The triplet quantum yield is determined by time-resolved singlet molecular oxygen phosphorescence detection in the near-IR (1270 nm), phenalenone in D<sub>2</sub>O is usually used as reference. Experimentally, the singlet oxygen quantum yield can be given by the following equation:

$$\int_0^{\infty} S_t dt = S_0 \times \frac{\tau_{\Delta}}{\tau_{\Delta} - \tau_t} \int_0^{\infty} [\exp(-t/\tau_{\Delta}) - \exp(-t/\tau_t)] dt$$

$$= S_0 \times \tau_{\Delta} = \kappa k_{\Delta,R} [{}^1PS^*]_0$$

where the time-integrated signals is proportional to factor of setup ( $\kappa$ ), radiative decay of singlet oxygen ( $k_{\Delta,R}$ ), the concentration of excited singlet species ( $[{}^1PS^*]_0$ ), the quantum yield ( $\Phi_{\Delta}$ ), and lifetime ( $\tau_{\Delta}$ ) of singlet oxygen. Thus, the calculated triplet state yield is obtained by following equation:

$$\Phi_{\Delta, sample} = \Phi_{\Delta, ref} \times \frac{S_{ss, sample}}{S_{ss, ref}} \times \frac{(\kappa k_{\Delta,R} I_{abs} \tau_{\Delta})_{ref}}{(\kappa k_{\Delta,R} I_{abs} \tau_{\Delta})_{sample}}$$

**Table S2.** Parameters from singlet phosphorescence detection in 1270 nm

|             | Solvent          | Integrate S       | $I_{abs}$ ( $\Delta OD$ ) | $k_{\Delta,R}$ | $\tau_{\Delta}$ ( $\mu s$ ) | $\Phi_{\Delta}$ |
|-------------|------------------|-------------------|---------------------------|----------------|-----------------------------|-----------------|
| <b>1</b>    | CHX              | $9.0 \times 10^4$ | 0.31                      | 0.44           | 35.6                        | 0.19            |
|             | THF              | $5.0 \times 10^4$ | 0.31                      | 0.41           | 24.4                        | 0.17            |
|             | ACE              | $6.3 \times 10^4$ | 0.29                      | 0.39           | 54.4                        | 0.11            |
| <b>2</b>    | CHX              | $17 \times 10^4$  | 0.28                      | 0.44           | 34.2                        | 0.42            |
|             | THF              | $8.8 \times 10^4$ | 0.3                       | 0.41           | 24.7                        | 0.30            |
|             | ACE              | $15 \times 10^4$  | 0.28                      | 0.39           | 58.6                        | 0.24            |
| Phenalenone | D <sub>2</sub> O | $26 \times 10^4$  | 0.28                      | 0.12           | 81.3                        | 0.98            |



## S5. Electrochemical experiments.

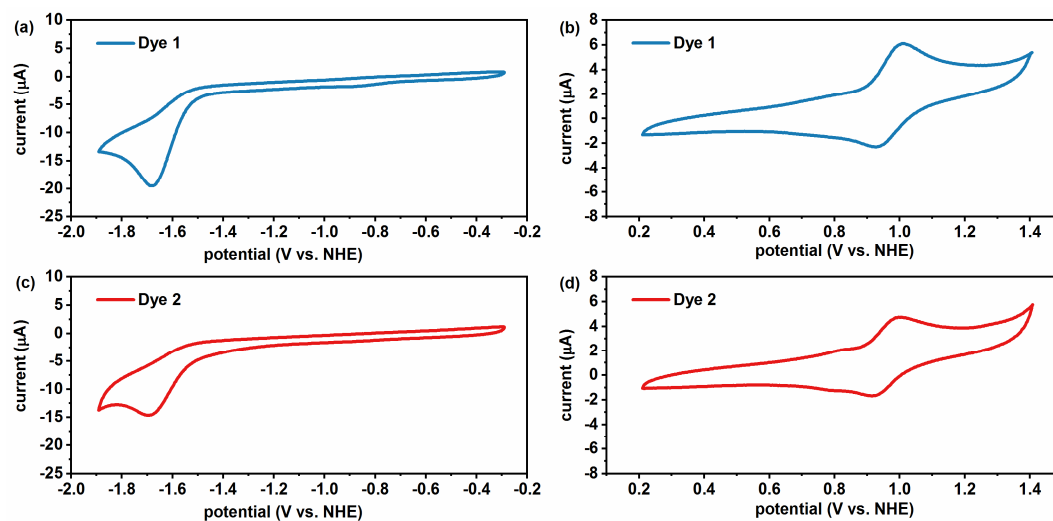

**Figure S9.** Cyclic voltammograms of dye 1 and dye 2 in dichloroethane with 0.1 M tetra-n-butylammonium hexafluorophosphate (Bu<sub>4</sub>NPF<sub>6</sub>) as the supporting electrolyte recorded using a scan rate of 100 mV s<sup>-1</sup>.

**Table S3.** Electrochemistry parameters

|       | $E_{ox}^a$ (v) | $E_{red}^a$ (v) | $\Delta G^b$ (v) |       |       |
|-------|----------------|-----------------|------------------|-------|-------|
|       |                |                 | CHX              | THF   | ACN   |
| Dye 1 | 0.96           | 1.54            | -0.64            | -0.48 | -0.46 |
| Dye 2 | 0.96           | 1.55            | -0.47            | -0.34 | -0.29 |

<sup>a</sup> is measured by Cyclic voltammetry as shown in Figure S9. <sup>b</sup> is calculated by Rehm-Weller equation from Ref 2:  $\Delta G = E_{ox} - E_{red} - E_{00} + C$ , The  $E_{00}$  values were obtained from the intersection of the normalized absorption and emission spectra of the fluorophores. C is the Coulombic term, which was estimated to be -0.06 eV and usually has small contribution to the overall energy change.

## S6. Electronic-state transitions.

**Table S4.** Vertical excited energies of dye **1** and dye **2** in gas phase at their optimized ground state geometries at the TD-DFT/CAM-B3LYP/6-31G(d, p) level.

|                           | Dye 1                  |                     | Dye 2                  |                     |
|---------------------------|------------------------|---------------------|------------------------|---------------------|
|                           | S <sub>1</sub>         | S <sub>2</sub>      | S <sub>1</sub>         | S <sub>2</sub>      |
| <i>E</i> (eV)             | 3.56 eV<br>(348 nm)    | 4.35 eV<br>(285 nm) | 3.34 eV<br>(371 nm)    | 4.20 eV<br>(295 nm) |
| oscillator strength       | 2.3298                 | 0.1375              | 2.0717                 | 0.0836              |
| main orbital contribution | H→L 0.56<br>H-1→L 0.27 | H-1→L 0.51          | H→L 0.59<br>H-1→L 0.29 | H-1→L 0.50          |

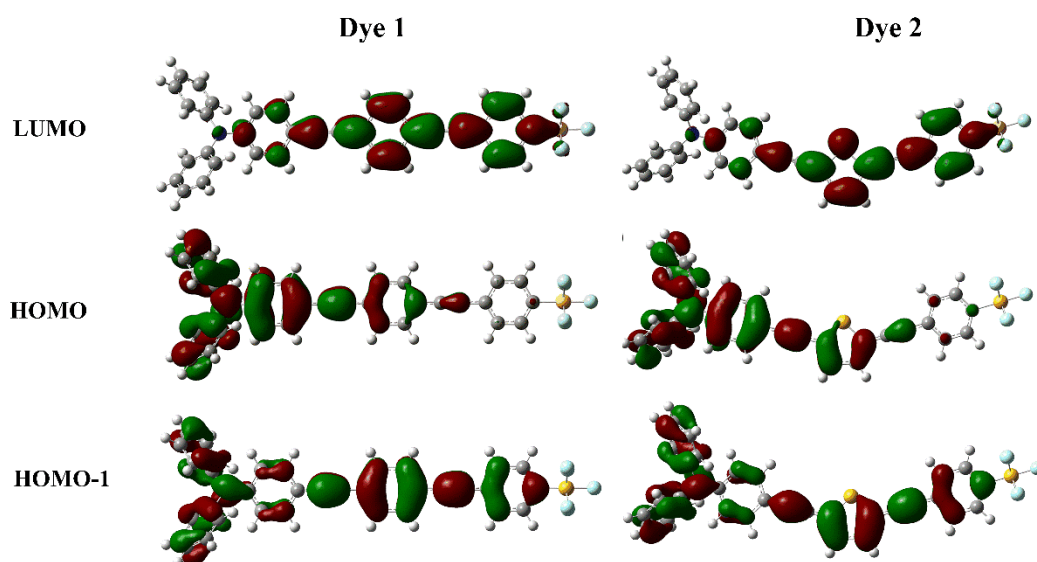

**Figure S10.** Electron density contours of molecular orbitals LUMO, HOMO, HOMO-1 at S<sub>0</sub> geometries of dye **1** and dye **2** in the gas phase.

## References

- (1) Horng, M. L.; Gardecki, J. A.; Papazyán, A.; Maroncelli, M. Subpicosecond Measurements of Polar Solvation Dynamics: Coumarin 153 Revisited. *J. Phys. Chem.* **1995**, *99*, 17311-17337.
